# Supplementary material
Source: publisher site journal article supplement (https://www.spandidos-publications.com/3463/downloadSupplementary)

Figure S1. Comparative genomic hybridization-array showing a normal female pattern. No gains or losses were detected in the breakpoints of the chromosomes involved in the translocation  $t(X; 9; 22)$  or in other chromosomes.

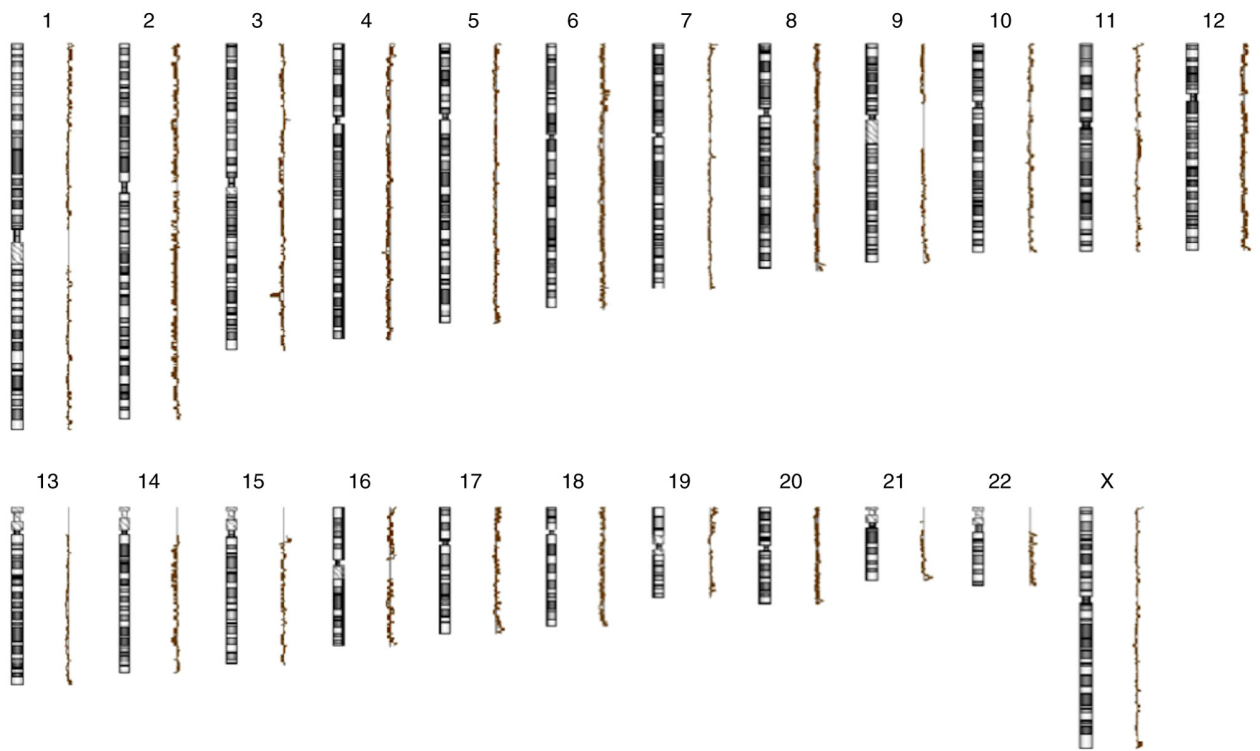

Supplement: Supplementary file 1 [file downloadSupplementary]
